# Supplementary material
Source: Springer Nature journal article supplement (https://www.springermedizin.de/resource/supplementary/13031_2013_128_MOESM3_ESM.pdf/9645216)

Figure 1: Variation in Abduction Frequencies over the Historical Timeline of the War

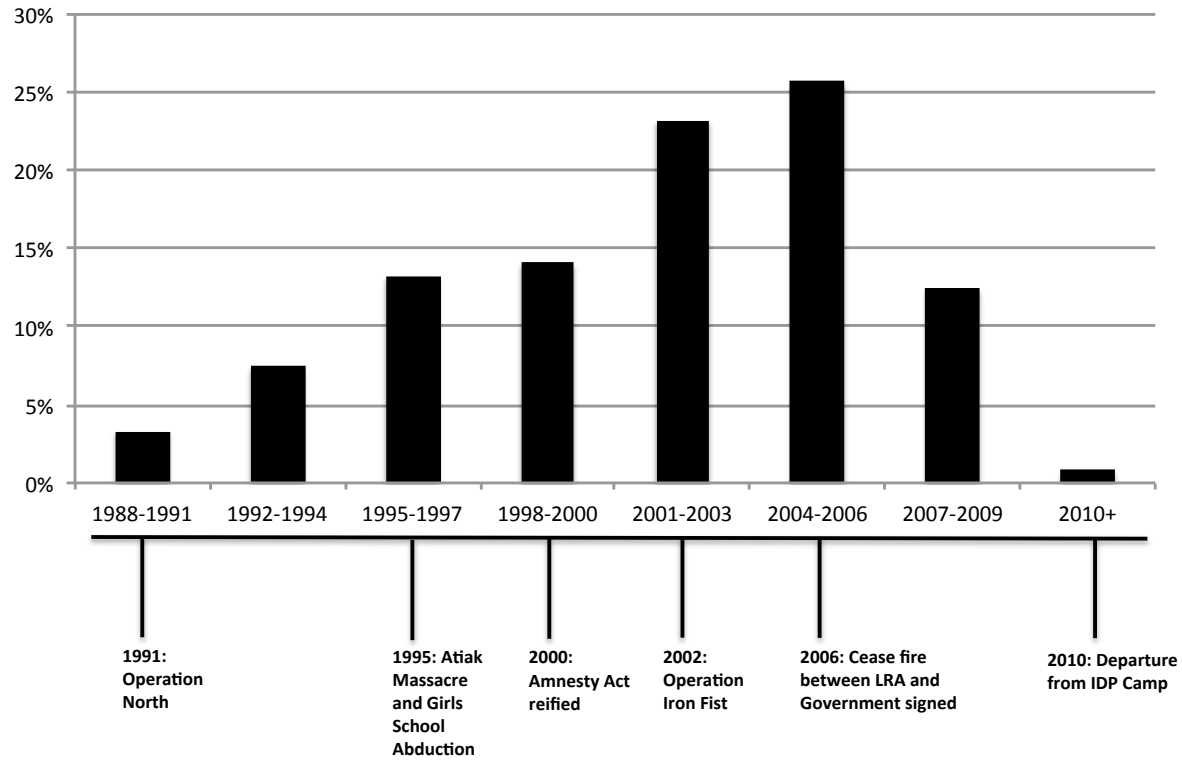

Supplement: MOESM3 [file 9645216]
